# Supplementary material
Source: publisher figshare collection journal article supplement (https://acs.figshare.com/ndownloader/files/4476859)
Supplement: Supplementary file 1 [file 4476859]

## Supplementary II

The proteins are either abundant yeast proteins or proteins not seen in all the three triplicates

|                                                         | Protein <sup>a</sup> | Function                                                                                |
|---------------------------------------------------------|----------------------|-----------------------------------------------------------------------------------------|
| Proteins of interest not appearing in all three repeats | SRO9                 | Cytoplasmic RNA-binding protein that associates with translating ribosomes              |
|                                                         | MEX67                | Poly(A)RNA binding protein involved in nuclear mRNA export                              |
|                                                         | BRR2                 | Required for disruption of U4/U6 base-pairing to activate the spliceosome for catalysis |
|                                                         | NOP58                | Protein involved in pre-rRNA processing, 18S rRNA and snoRNA synthesis                  |
|                                                         | TIF34                | Subunit of the core complex of translation initiation factor 3(eIF3)                    |
|                                                         | HYP2                 | Translation initiation factor eIF-5A, promotes formation of the first peptide bond      |
|                                                         | UTP22                | Possible U3 snoRNP protein involved in maturation of pre-18S rRNA                       |
| Ribosomal proteins                                      | RPS1A                | Ribosomal protein 10 (rp10) of the small (40S) subunit;                                 |
|                                                         | RPL9A                | Protein component of the large (60S) ribosomal subunit                                  |
|                                                         | RPS7B                | Protein component of the small (40S) ribosomal subunit                                  |
|                                                         | RPL5                 | Protein component of the large (60S) ribosomal subunit                                  |
|                                                         | RPL11B*              | Protein component of the large (60S) ribosomal subunit                                  |
|                                                         | MDN1*                | Dynein-related AAA-type ATPase, forms extended pre-60S particle with Rix1 complex       |
|                                                         | RPL40A*              | A ribosomal protein of the large (60S) ribosomal subunit                                |
|                                                         | RPL30                | Protein component of the large (60S) ribosomal subunit                                  |
|                                                         | RPS22A               | Protein component of the small (40S) ribosomal subunit                                  |
|                                                         | RPL31B               | Protein component of the large (60S) ribosomal subunit                                  |

|                               | <b>Protein</b> | <b>Function</b>                                                                               |
|-------------------------------|----------------|-----------------------------------------------------------------------------------------------|
| <b>Yeast abundant enzymes</b> | CDC19*         | Pyruvate kinase, functions in glycolysis to convert phosphoenolpyruvate to pyruvate           |
|                               | TDH1*          | Glyceraldehyde-3-phosphate dehydrogenase, involved in glycolysis and gluconeogenesis          |
|                               | TDH3*          | Glyceraldehyde-3-phosphate dehydrogenase, involved in glycolysis and gluconeogenesis          |
|                               | SNF1*          | Serine/threonine protein kinase, required for transcription of glucose-repressed genes        |
|                               | GCV2           | Part of mitochondrial glycine decarboxylase complex, required for the catabolism of glycine   |
|                               | DYN1           | Microtubule motor protein, required for anaphase spindle elongation                           |
|                               | MAS1           | Mitochondrial processing protease                                                             |
|                               | PBS2           | MAP kinase that plays a pivotal role in the osmosensing signal-transduction pathway           |
|                               | BEM2           | Rho GTPase activating protein, controls of cytoskeleton organization & cellular morphogenesis |
|                               | GCN1           | Positive regulator of the Gcn2p kinase activity                                               |
|                               | TDH2           | Glyceraldehyde-3-phosphate dehydrogenase, involved in glycolysis and gluconeogenesis          |
|                               | ENO1           | Enolase I: involved in glycolysis and gluconeogenesis                                         |
|                               | ENO2           | Enolase II: involved in glycolysis and gluconeogenesis                                        |
|                               | TPS3           | Regulatory subunit of trehalose-6-phosphate synthase/phosphatase complex                      |
|                               | SEC23          | GTPase-activating protein                                                                     |
|                               | ACS2           | Acetyl-coA synthetase isoform, is the nuclear source of acetyl-coA for histone acetylation    |
|                               | THS1           | Threonyl-tRNA synthetase, essential cytoplasmic protein                                       |
|                               | TFP1           | Vacuolar ATPase V1 domain subunit A containing the catalytic nucleotide binding sites         |
|                               | ADH3           | Mitochondrial alcohol dehydrogenase isozyme III                                               |
|                               | GLK1           | Glucokinase, catalyzes phosphorylation of glucose in glucose metabolism                       |
|                               | TPS1           | Trehalose-6-phosphate synthase; which synthesizes the storage carbohydrate trehalose          |
|                               | URA2           | Catalyzes the first two enzymatic steps in the de novo biosynthesis of pyrimidines            |
|                               | NUP159         | Nucleoporin, subunit of the nuclear pore complex; required for mRNA export                    |

|                           | Protein | Function                                                                            |
|---------------------------|---------|-------------------------------------------------------------------------------------|
| Heat<br>shock<br>proteins | YDJ1*   | Protein chaperone involved in regulation of the HSP90 and HSP70 functions           |
|                           | SSA2*   | Member of HSP70 family; ATP binding protein involved in protein folding & transport |
|                           | SIS1    | Type II HSP40 co-chaperone                                                          |
|                           | SSA1    | Member of HSP70 family; ATPase involved in protein folding and nuclear transport    |

<sup>a</sup>The asterix beside the protein names indicate the contaminants found in control pull-downs.
